# Supplementary material for: Rho1 activation recapitulates early gastrulation events in the ventral, but not dorsal, epithelium of Drosophila embryos
Source: eLife journal article supplement (doi:10.7554/elife.56893), 2020-11-17
Supplement: supp [file elife-56893-supp-v1.zip]

## Pre Z-stack

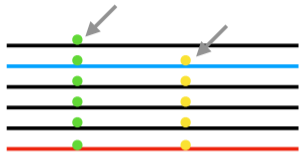

## Activation (Single Plane)

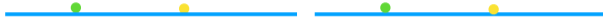

## Post Z-stack

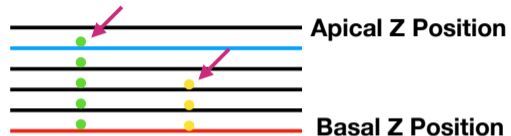

Cell Cell ID

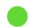

001

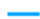

Activation Plane

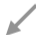

“Pre” values for indicated  
cell came from this plane

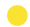

002

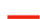

Basal-most Plane

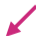

“Post” values for indicated  
cell came from this plane
