# Supplementary material for: Rho1 activation recapitulates early gastrulation events in the ventral, but not dorsal, epithelium of Drosophila embryos
Source: eLife journal article supplement (doi:10.7554/elife.56893), 2020-11-17
Supplement: supp [file elife-56893-supp-v1.zip]

Dorsal

Ventral

Apical Slice

Max Proj

Activated

Non-Activated

Pre

Post

Pre

Post

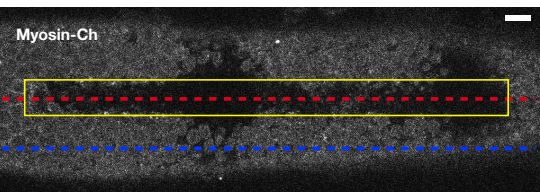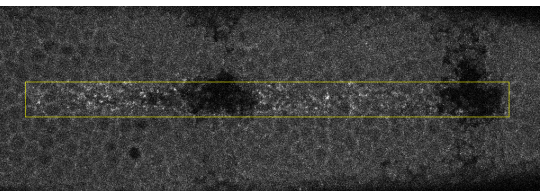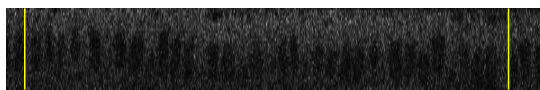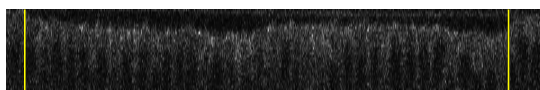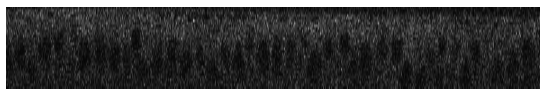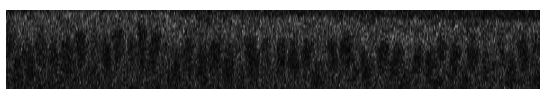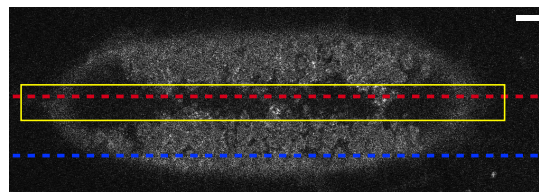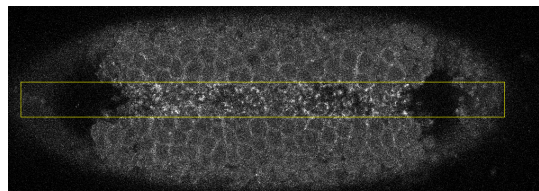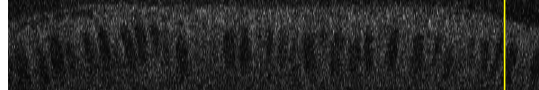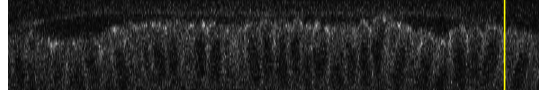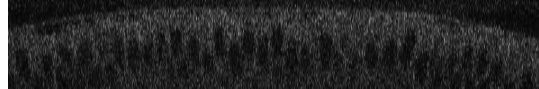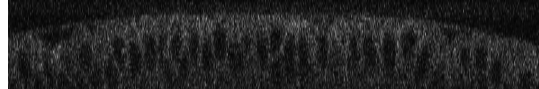

Average Myosin Intensity (AU)

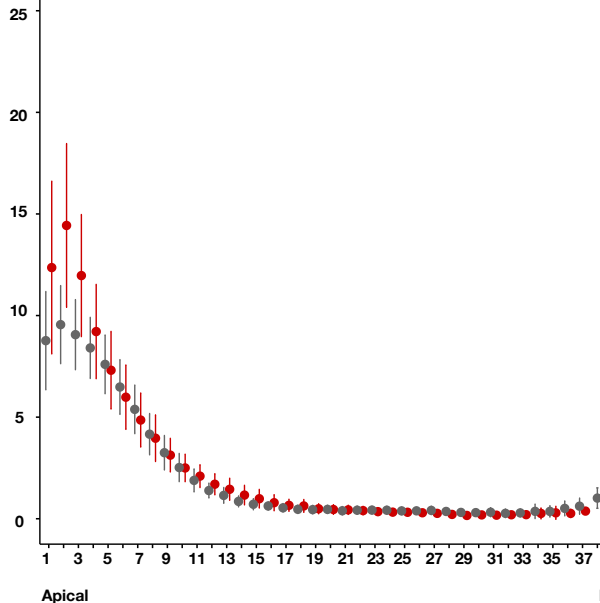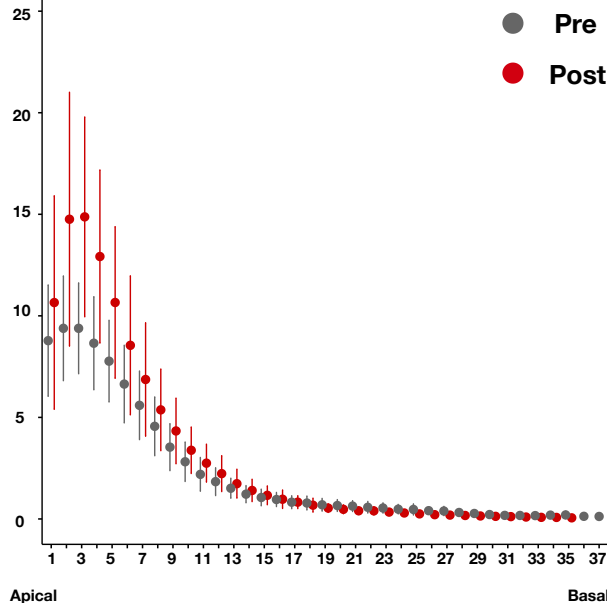

Apicobasal Position (μm)

Pre  
Post
