# Supplementary material for: Rho1 activation recapitulates early gastrulation events in the ventral, but not dorsal, epithelium of Drosophila embryos
Source: eLife journal article supplement (doi:10.7554/elife.56893), 2020-11-17
Supplement: supp [file elife-56893-supp-v1.zip]

Archive with 15 entries (15 files):
- elife_poa_e56893_Figure_5_video_1.avi
- elife_poa_e56893_Figure_1_figure_supplement_1.pdf
- elife_poa_e56893_Figure_1_figure_supplement_2.pdf
- elife_poa_e56893_Figure_1_figure_supplement_3.pdf
- elife_poa_e56893_Figure_2_figure_supplement_1.pdf
- elife_poa_e56893_Figure_2_figure_supplement_2.pdf
- elife_poa_e56893_Figure_3_figure_supplement_1.pdf
- elife_poa_e56893_Figure_3_figure_supplement_2.pdf
- elife_poa_e56893_Figure_3_figure_supplement_3.pdf
- elife_poa_e56893_Figure_4_figure_supplement_1.pdf
- elife_poa_e56893_Figure_4_figure_supplement_2.pdf
- elife_poa_e56893_Figure_4_figure_supplement_3.pdf
- elife_poa_e56893_Figure_4_figure_supplement_4.pdf
- elife_poa_e56893_Figure_5_figure_supplement_1.pdf
- elife_poa_e56893_Transparent_Reporting_File.docx
