# Supplementary material for: Rho1 activation recapitulates early gastrulation events in the ventral, but not dorsal, epithelium of Drosophila embryos
Source: eLife journal article supplement (doi:10.7554/elife.56893), 2020-11-17

Activation Zone  
Geometry:

Rectangle

Rectangle

Rectangle

Square

Genetic  
Background:

*dorsal*

*twist*

RhoGEF2 RNAi

Wildtype

Pre

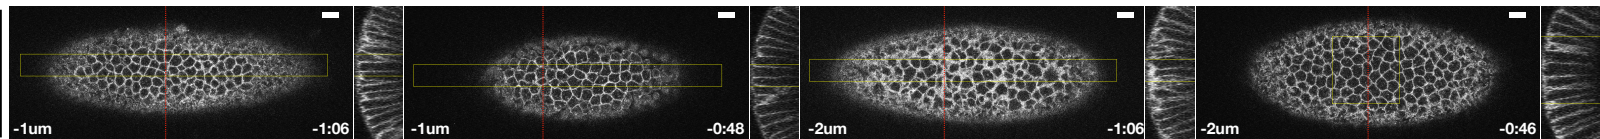

Post

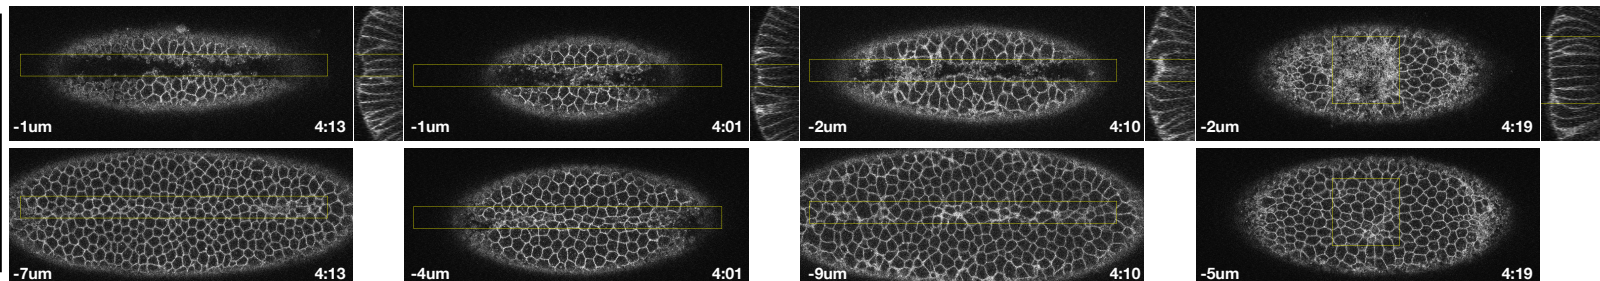

Supplement: supp [file elife-56893-supp-v1.zip]
