# Supplementary material for: Rho1 activation recapitulates early gastrulation events in the ventral, but not dorsal, epithelium of Drosophila embryos
Source: eLife journal article supplement (doi:10.7554/elife.56893), 2020-11-17

Global  
Activation

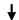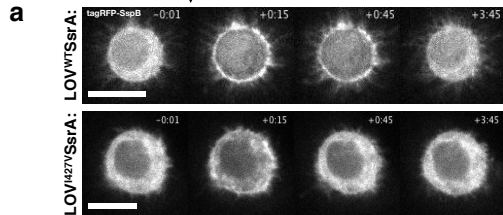

Global  
Activation

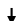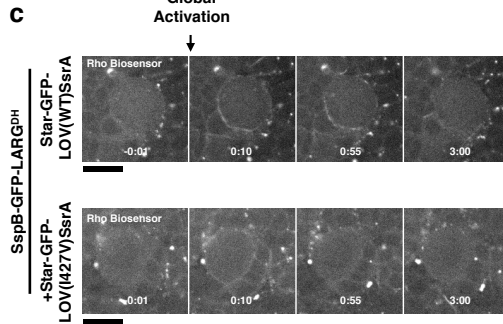

**b**

Cortical Enrichment  
(tagRFP-SspB)

LOV<sup>WT</sup>SsrA

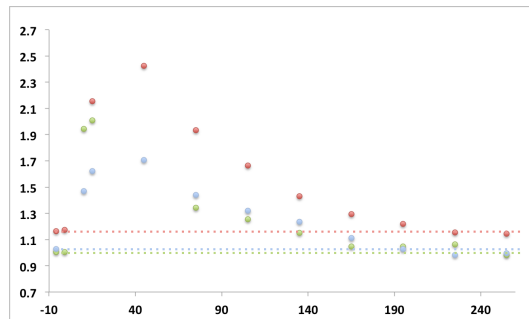

LOV<sup>I427V</sup>SsrA

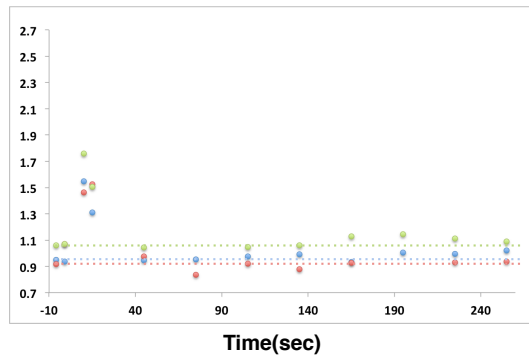

Supplement: supp [file elife-56893-supp-v1.zip › elife_poa_e56893_Figure_1_figure_supplement_3.pdf]
