# Supplementary material for: Rho1 activation recapitulates early gastrulation events in the ventral, but not dorsal, epithelium of Drosophila embryos
Source: eLife journal article supplement (doi:10.7554/elife.56893), 2020-11-17
Supplement: supp [file elife-56893-supp-v1.zip › elife_poa_e56893_Figure_2_figure_supplement_1.pdf]

**Ventral  
Endogenous**

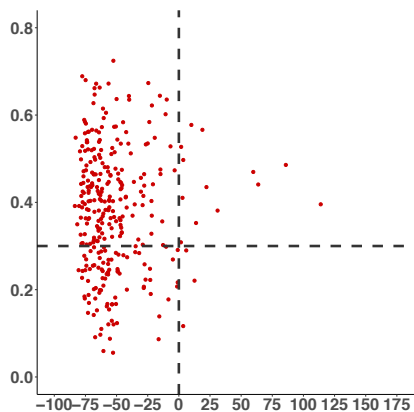

**Dorsal  
Activated**

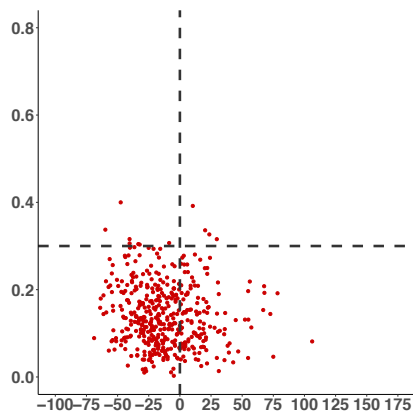

**Ventral  
Activated**

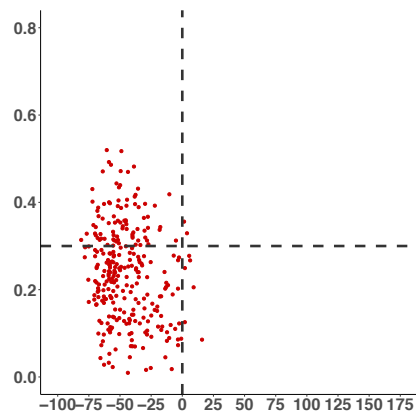

**Magnitude of  
Anisotropy**

**Angle of  
Anisotropy**

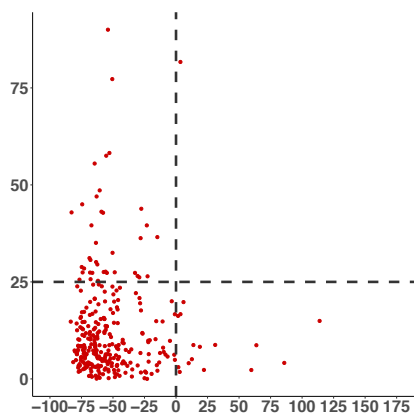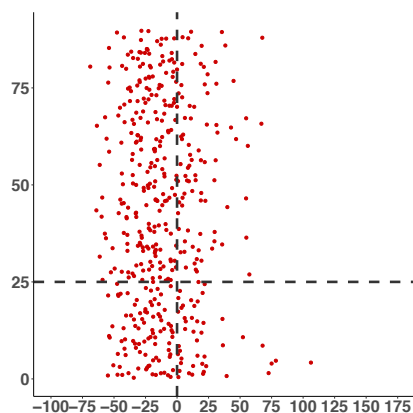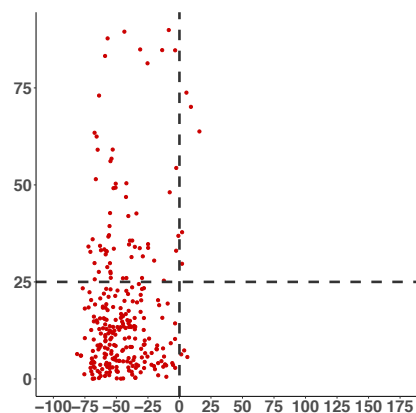

**Mag \*  
Cos (Angle)**

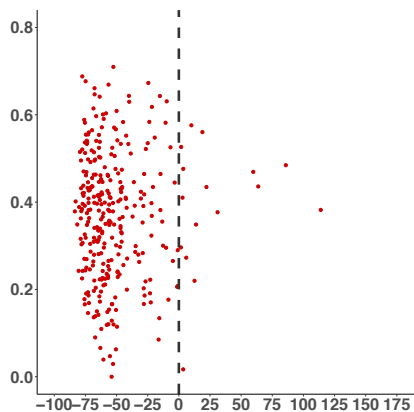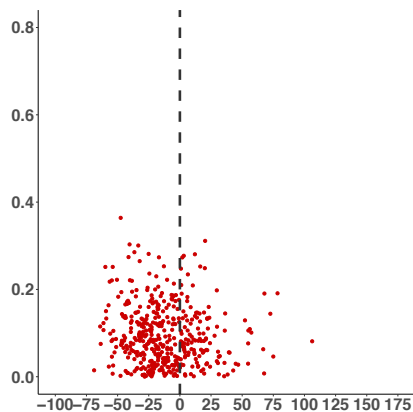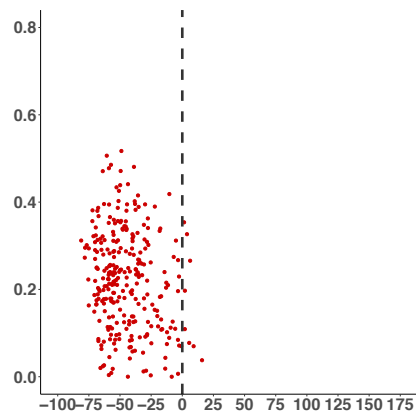

**Percent Area Change**
