# Supplementary material for: Rho1 activation recapitulates early gastrulation events in the ventral, but not dorsal, epithelium of Drosophila embryos
Source: eLife journal article supplement (doi:10.7554/elife.56893), 2020-11-17
Supplement: supp [file elife-56893-supp-v1.zip › elife_poa_e56893_Figure_4_figure_supplement_1.pdf]

Change in Magnitude of Anisotropy (AU)

**WT Dorsal**

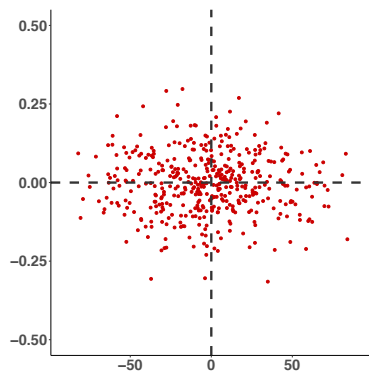

**WT Ventral**

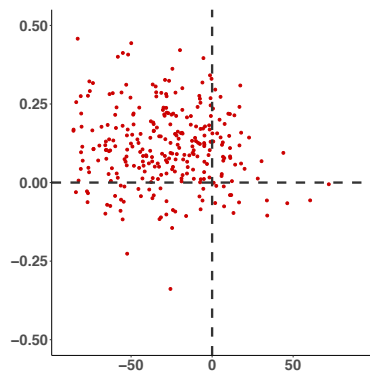

***dorsal* Ventral**

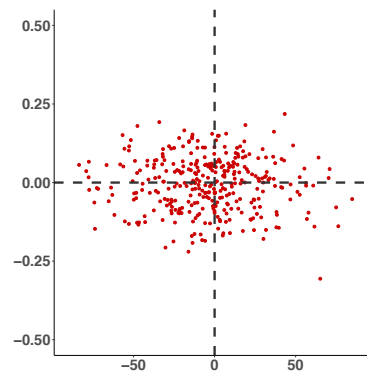

***twist* Ventral**

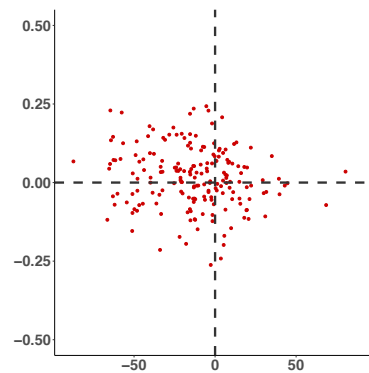

**WT Ventral  
Square Zone**

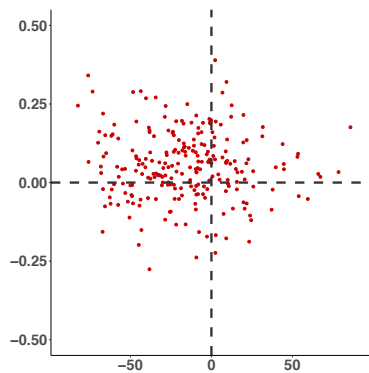

**RhoGEF2 RNAi Ventral**

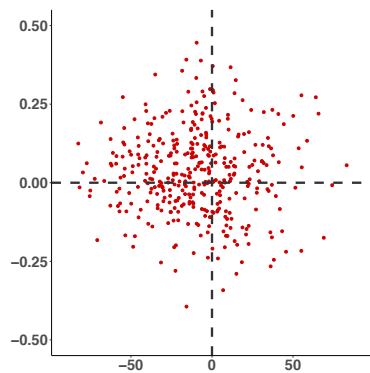

**RhoGEF2 RNAi Dorsal**

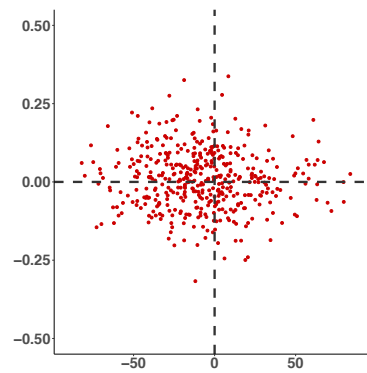

Change in Angle of Anisotropy (Deg)
