# Supplementary material for: Rho1 activation recapitulates early gastrulation events in the ventral, but not dorsal, epithelium of Drosophila embryos
Source: eLife journal article supplement (doi:10.7554/elife.56893), 2020-11-17
Supplement: supp [file elife-56893-supp-v1.zip › elife_poa_e56893_Figure_4_figure_supplement_2.pdf]

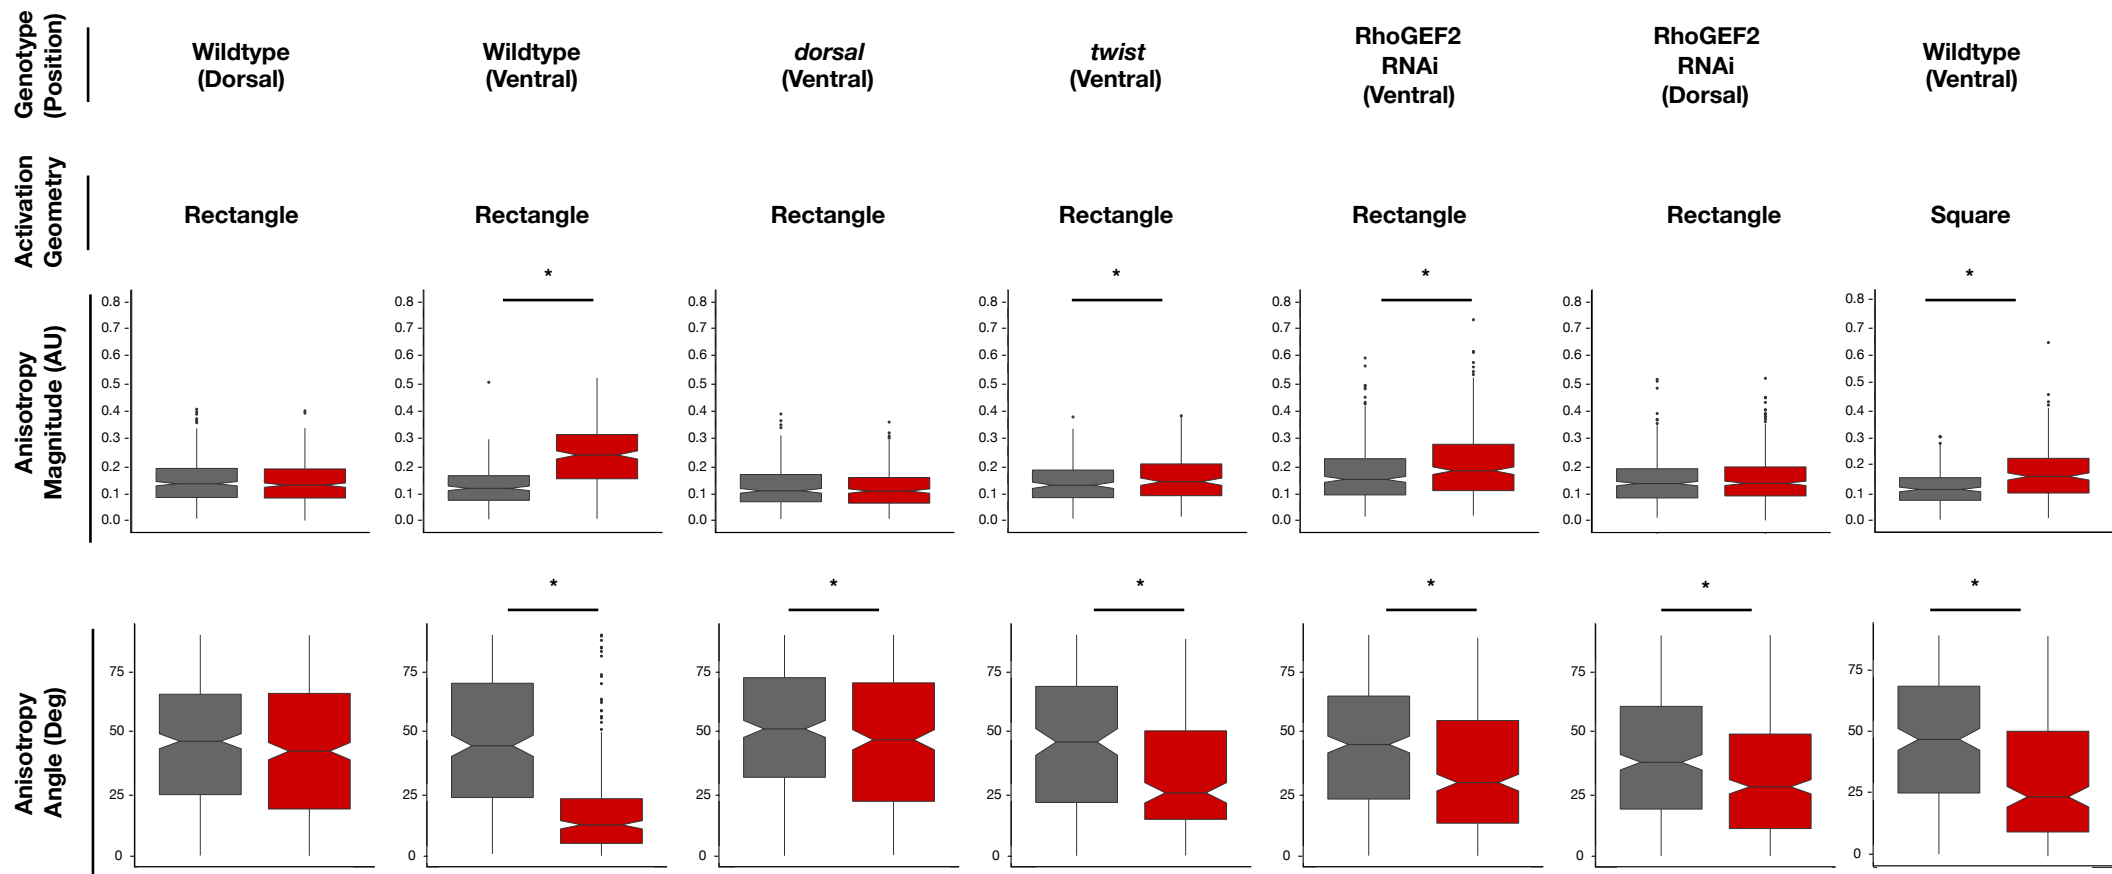

| Genotype               | Position of Activation Region | Time of measurement | Anisotropy angle |                          | P value   | Anisotropy magnitude |                    | P value   |
|------------------------|-------------------------------|---------------------|------------------|--------------------------|-----------|----------------------|--------------------|-----------|
|                        |                               |                     | Average (deg)    | Standard Deviation (+/-) |           | Average (AU)         | Standard Deviation |           |
| Wildtype               | Dorsal                        | Pre-activation      | 45.0             | 25.4                     | 0.1372    | 0.14                 | 0.08               | 0.396     |
|                        |                               | Post-activation     | 42.9             | 26.5                     |           | 0.14                 | 0.07               |           |
| Wildtype               | Ventral                       | Pre-activation      | 46.1             | 27.1                     | < 2.2E-16 | 0.13                 | 0.07               | < 2.2E-16 |
|                        |                               | Post-activation     | 18.1             | 18.8                     |           | 0.24                 | 0.11               |           |
| <i>dorsal</i>          | Ventral                       | Pre-activation      | 49.9             | 25.4                     | 0.01      | 0.12                 | 0.07               | 0.311     |
|                        |                               | Post-activation     | 45.8             | 27.0                     |           | 0.12                 | 0.17               |           |
| <i>twist</i>           | Ventral                       | Pre-activation      | 46.2             | 25.4                     | 1.1E-09   | 0.14                 | 0.07               | 0.02      |
|                        |                               | Post-activation     | 33.2             | 24.1                     |           | 0.15                 | 0.08               |           |
| RhoGEF2 (RNAi)         | Ventral                       | Pre-activation      | 44.9             | 24.9                     | 6.6E-10   | 0.17                 | 0.10               | 3E-06     |
|                        |                               | Post-activation     | 35.3             | 25.2                     |           | 0.21                 | 0.12               |           |
| RhoGEF2 (RNAi)         | Dorsal                        | Pre-activation      | 40.9             | 25.1                     | 4.1E-09   | 0.15                 | 0.08               | 0.149     |
|                        |                               | Post-activation     | 32.9             | 24.9                     |           | 0.15                 | 0.09               |           |
| Wildtype Square region | Ventral                       | Pre-activation      | 47.2             | 25.5                     | 2.5E-13   | 0.12                 | 0.06               | 5.4E-12   |
|                        |                               | Post-activation     | 31.5             | 25.6                     |           | 0.18                 | 0.09               |           |

Pre

Post
