# Supplementary material for: Rho1 activation recapitulates early gastrulation events in the ventral, but not dorsal, epithelium of Drosophila embryos
Source: eLife journal article supplement (doi:10.7554/elife.56893), 2020-11-17
Supplement: supp3 [file elife-56893-supp3-v2.pdf]

| Figure                                      | Genotype                                                                                                                                                | Replicates                                    |
|---------------------------------------------|---------------------------------------------------------------------------------------------------------------------------------------------------------|-----------------------------------------------|
| <b>Figure 1–Figure Supplement 1a</b>        |                                                                                                                                                         | 2/2 pupae                                     |
| <b>Figure 1–Figure Supplement 1b</b>        | <i>SspB-GFP-LARG(DH); Stargazin-GFP*-LOVSsrA, Sqh-mCherry</i>                                                                                           | 4/4 egg chambers                              |
| <b>Figure 1–Figure Supplement 1c</b>        |                                                                                                                                                         | 5/5 (left), 3/3 (right) wing discs            |
| <b>Figure 1–Figure Supplement 1d</b>        |                                                                                                                                                         | 2 CNSs ; 6 Neuroblasts                        |
| <b>Figure 1–Figure Supplement 2</b>         | <i>SspB-GFP-LARG(DH); Stargazin-GFP*-LOVSsrA, Sqh-mCherry</i>                                                                                           | 3/3 wing discs                                |
| <b>Figure 1–Figure Supplement 3a-top</b>    | Transfection: tagRFP-SspB + Stargazin-GFP*-LOVSsrA                                                                                                      | 3/3 cells                                     |
| <b>Figure 1–Figure Supplement 3a-bottom</b> | Transfection: tagRFP-SspB + Stargazin-GFP*-LOV(I427V)SsrA                                                                                               | 3/3 cells                                     |
| <b>Figure 1–Figure Supplement 3c-top</b>    | <i>SspB-GFP-LARG(DH) Ubi&gt;mCherry-Anillin(RB) ; Stargazin-GFP*-LOVSsrA</i>                                                                            | 3 brains ; 16 neuroblasts                     |
| <b>Figure 1–Figure Supplement 3c-bottom</b> | <i>SspB-GFP-LARG(DH) Ubi&gt;mCherry-Anillin(RB); Stargazin-GFP*-LOV(I427V)SsrA</i>                                                                      | 4 brains ; 19 neuroblasts                     |
| <b>Figure 2–Figure Supplement 1</b>         | see <b>Figure 2b-d</b> & <b>Figure 4b-c</b>                                                                                                             | see <b>Figure 2b-d</b> & <b>Figure 4b-c</b>   |
| <b>Figure 2–Figure Supplement 2</b>         | F1 of: <i>Sqh-GFP/Cyo ; Gap43-Ch/TM6</i>                                                                                                                | 3/3 embryos; 436 cells                        |
| <b>Figure 3–Figure Supplement 1</b>         | <i>SspB-GFP-LARG(DH) ; Stargazin-GFP*-LOVSsrA, Sqh-Ch / Stargazin-GFP*-LOVSsrA</i>                                                                      | 3/3 embryos                                   |
| <b>Figure 3–Figure Supplement 2</b>         | <i>SspB-GFP-LARG(DH) ; Stargazin-GFP*-LOVSsrA, Sqh-Ch / Stargazin-GFP*-LOVSsrA</i>                                                                      | 4/5 embryos (dorsal)                          |
| <b>Figure 3–Figure Supplement 3</b>         | F1 of: <i>P(mat-tub-Gal4)mat67 / SspB-GFP-LARG(DH); SspB-GFP-LARG(DH), Stargazin-GFP*-LOVSsrA, Sqh-Ch / Stargazin-GFP*-LOVSsrA UAS&gt;RhoGEF2 shRNA</i> | 4/4 embryos (dorsal)<br>5/5 embryos (ventral) |
| <b>Figure 4–Figure Supplement 1</b>         | see <b>Figure 4</b> & <b>Figure 5</b>                                                                                                                   | see <b>Figure 4</b> & <b>Figure 5</b>         |
| <b>Figure 4–Figure Supplement 2</b>         | see <b>Figure 4</b> & <b>Figure 5</b>                                                                                                                   | see <b>Figure 4</b> & <b>Figure 5</b>         |
| <b>Figure 4–Figure Supplement 3</b>         | <i>SspB-GFP-LARG(DH) ; Stargazin-GFP*-LOVSsrA, Gap43-Ch</i>                                                                                             | 4/4 embryos                                   |
| <b>Figure 5–Figure Supplement 1</b>         | See <b>Figure 5</b>                                                                                                                                     | See <b>Figure 5</b>                           |
