# Supplementary figures and images for: Rho1 activation recapitulates early gastrulation events in the ventral, but not dorsal, epithelium of Drosophila embryos
Source: eLife journal article supplement (doi:10.7554/elife.56893), 2020-11-17

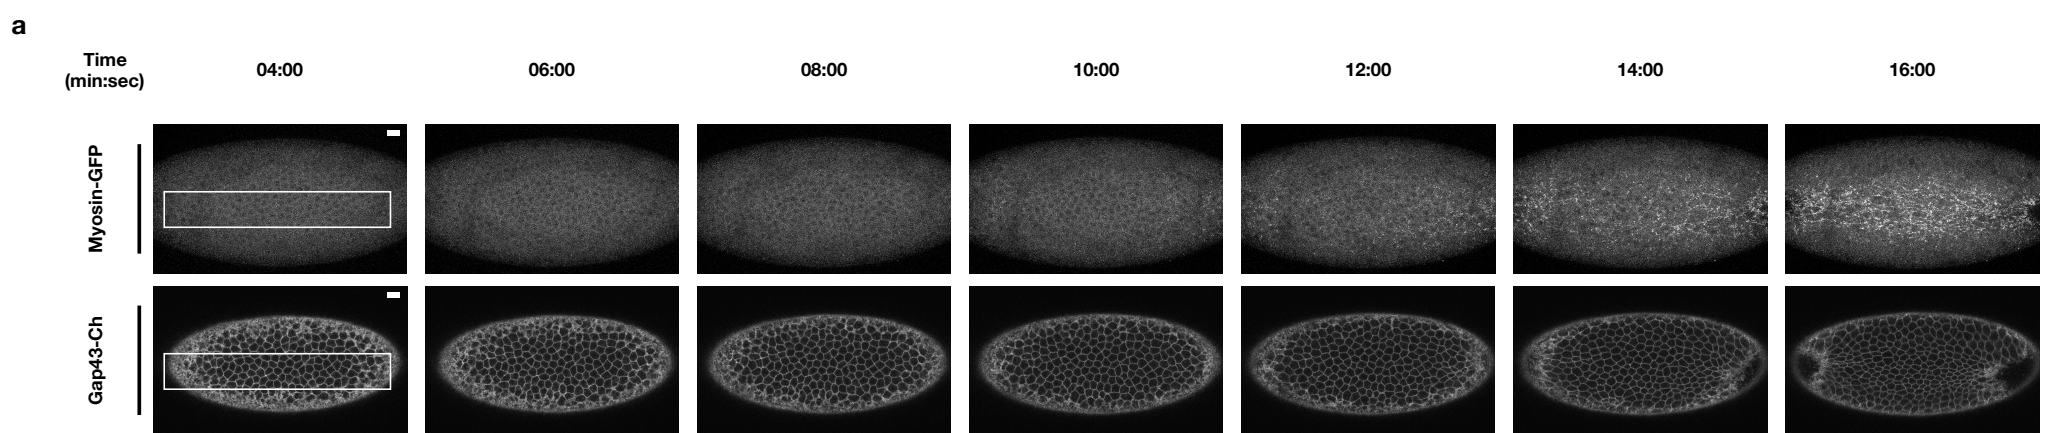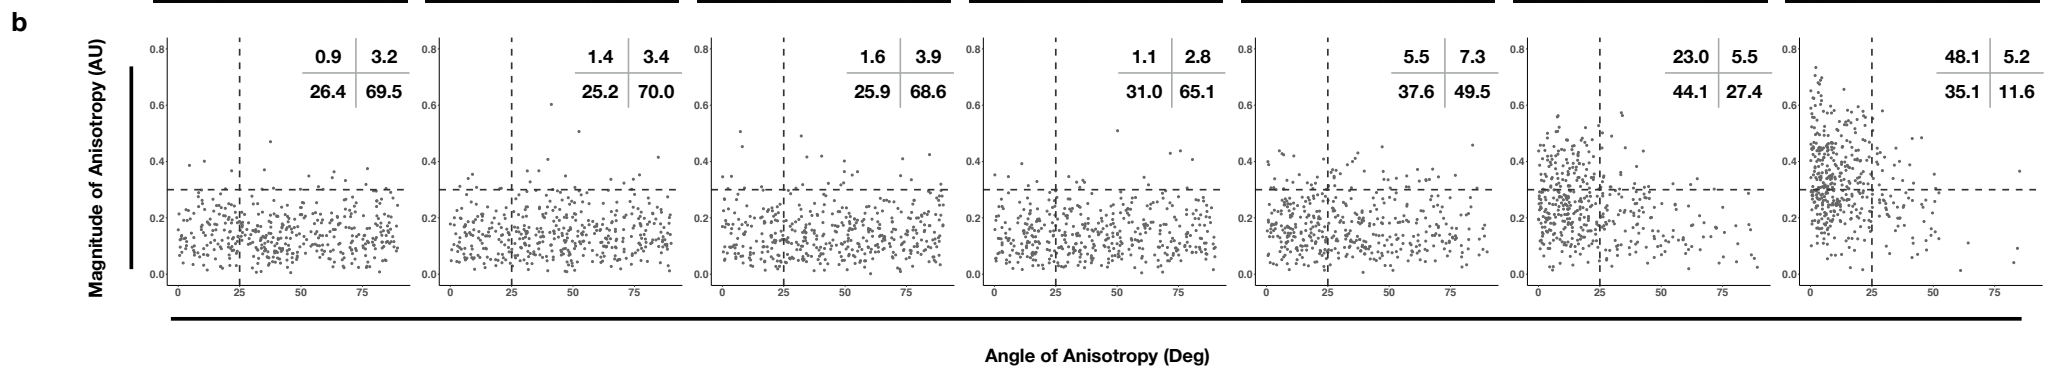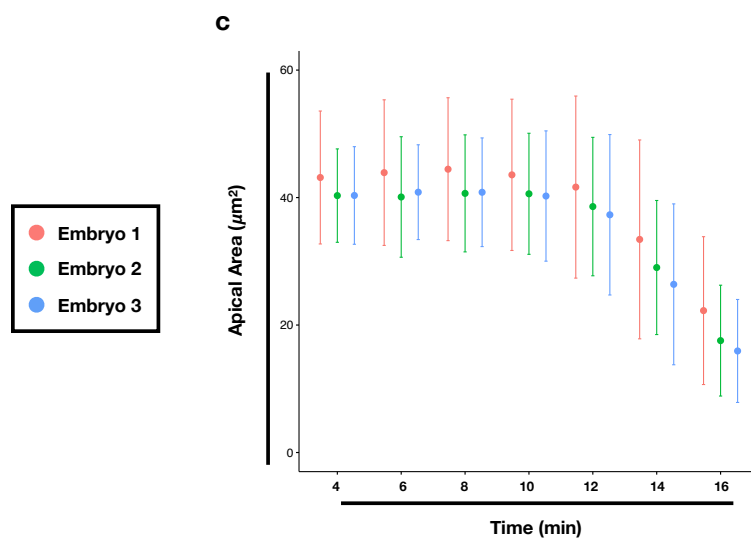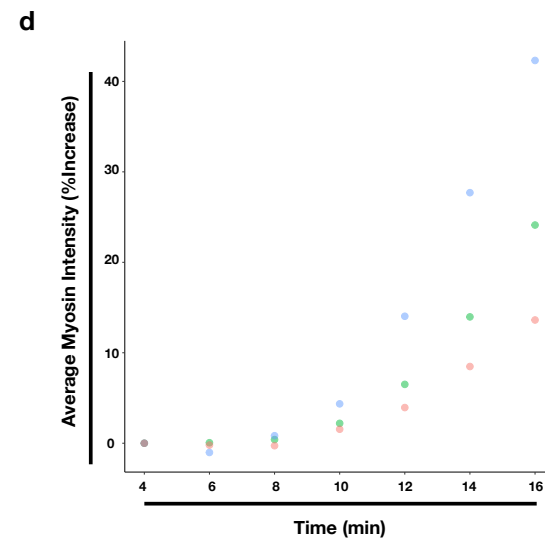

Supplement: supp [file elife-56893-supp-v1.zip]

**Myosin-Ch**      **0.2%**      **1%**      **2%**      **5%**      **10%**

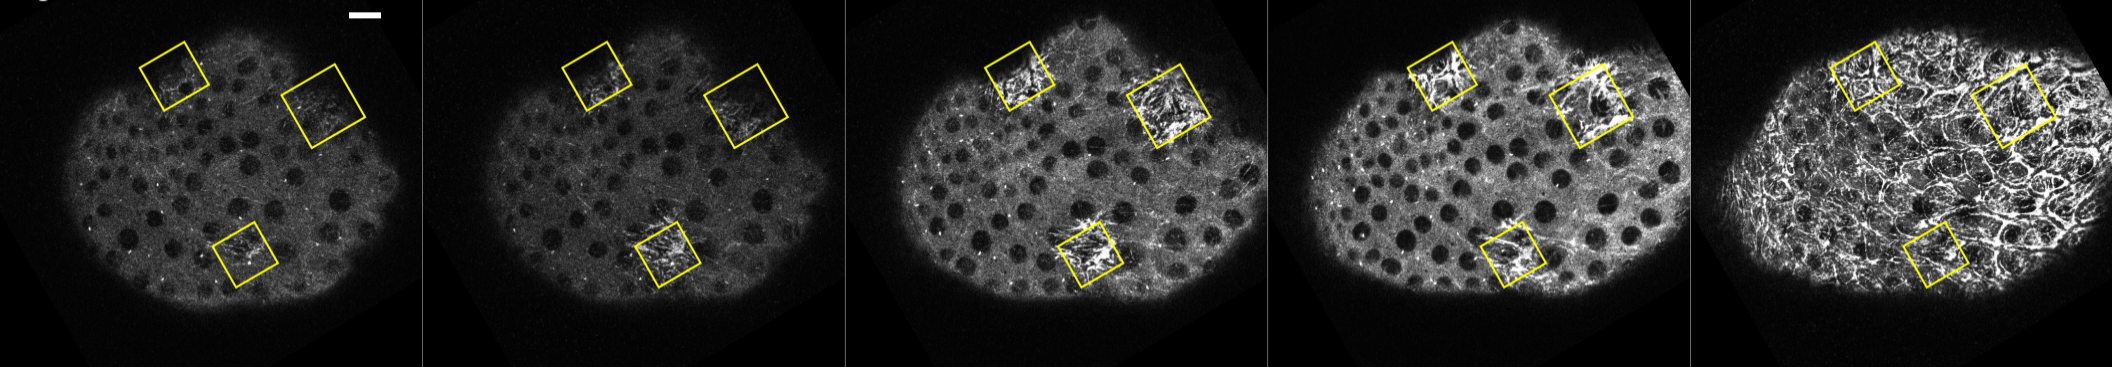

Supplement: supp [file elife-56893-supp-v1.zip]

**Gap43-Ch**

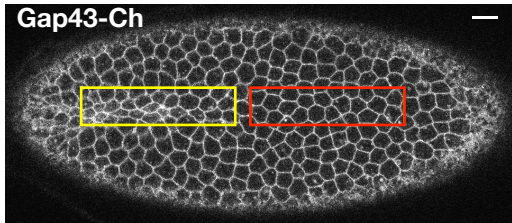

**Activated**

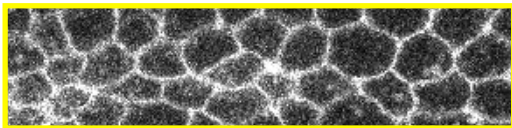

**Non-Activated**

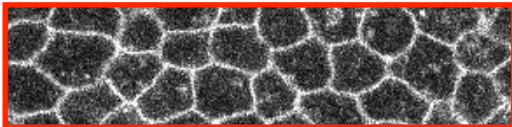

Supplement: supp [file elife-56893-supp-v1.zip]

# Global Activation

# Local Activation

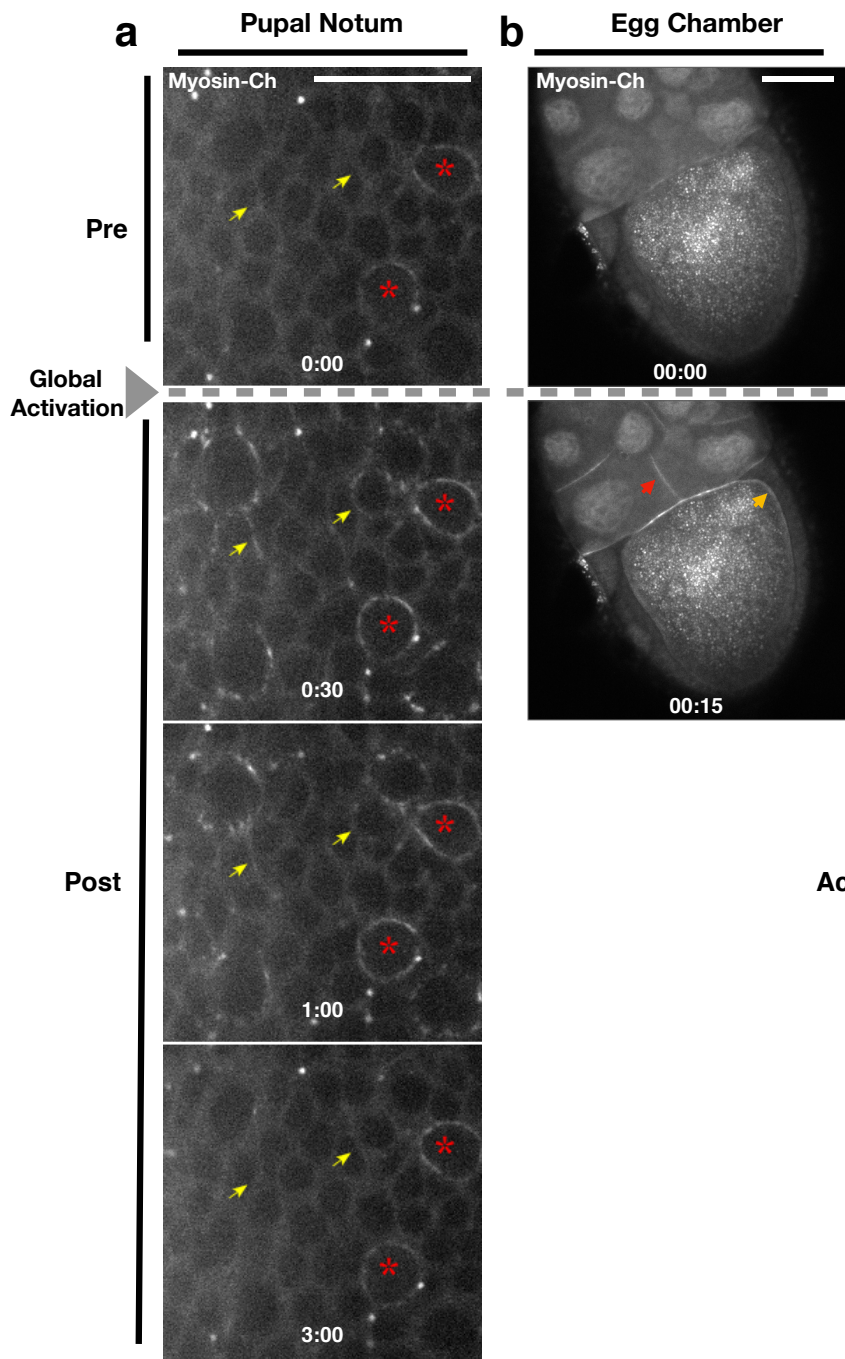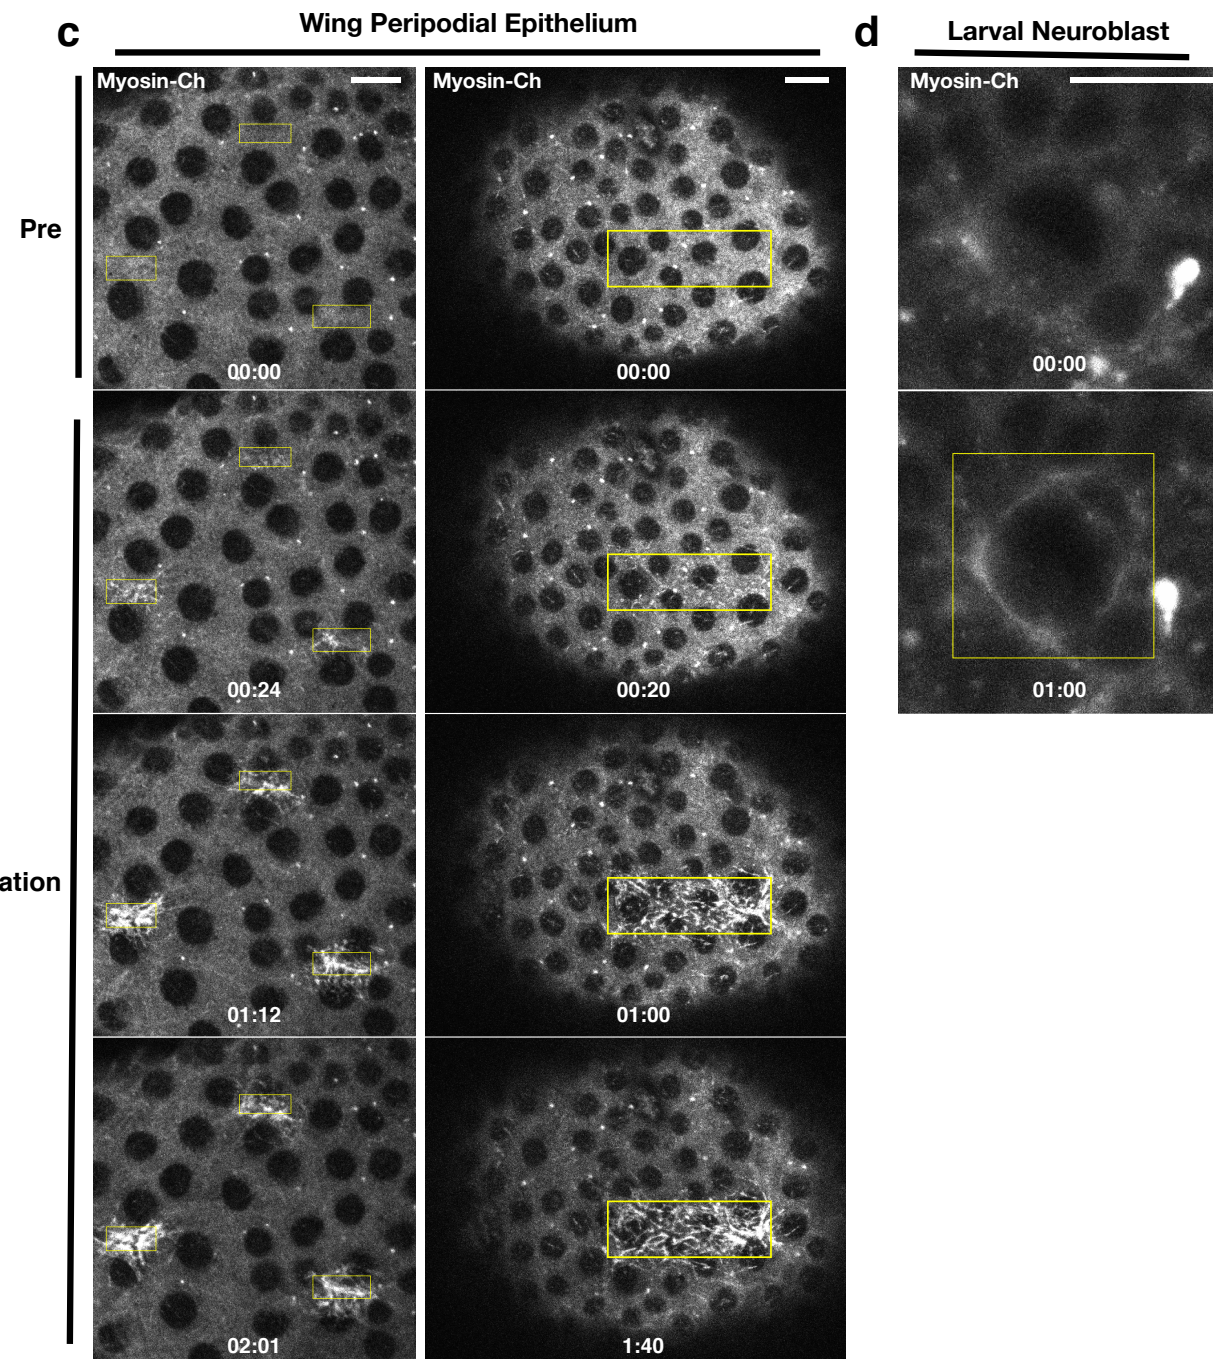

Supplement: supp [file elife-56893-supp-v1.zip › elife_poa_e56893_Figure_1_figure_supplement_1.pdf]

**Embryo 1**

**Embryo 2**

**Embryo 3**

**Pre**

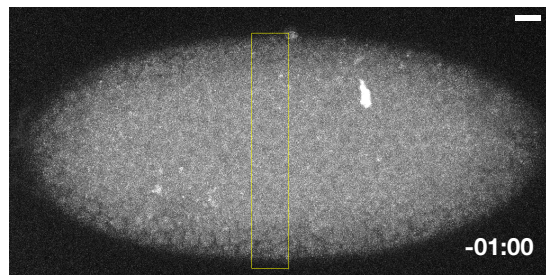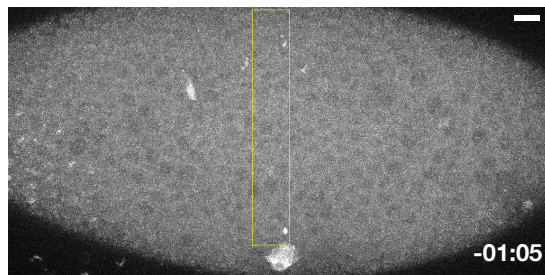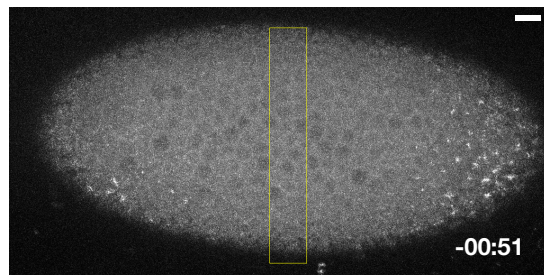

**Post**

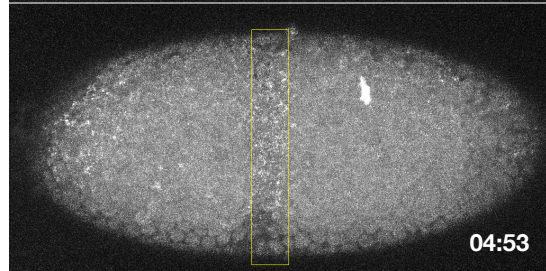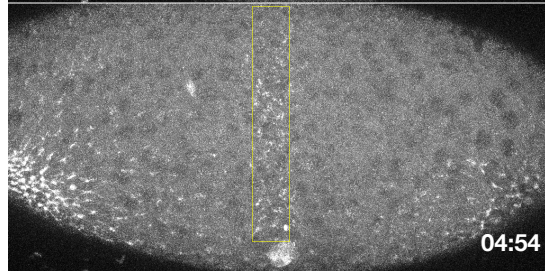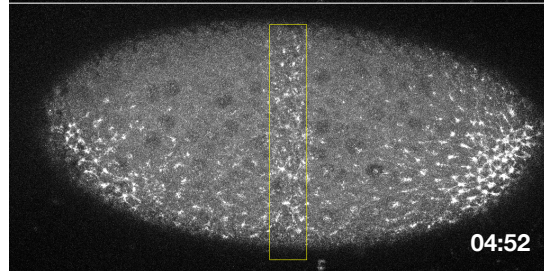

**Recovered**

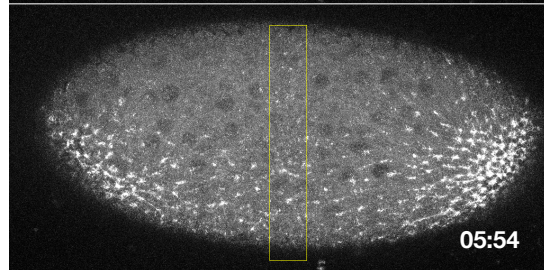

Supplement: supp [file elife-56893-supp-v1.zip › elife_poa_e56893_Figure_3_figure_supplement_1.pdf]

# Dorsal

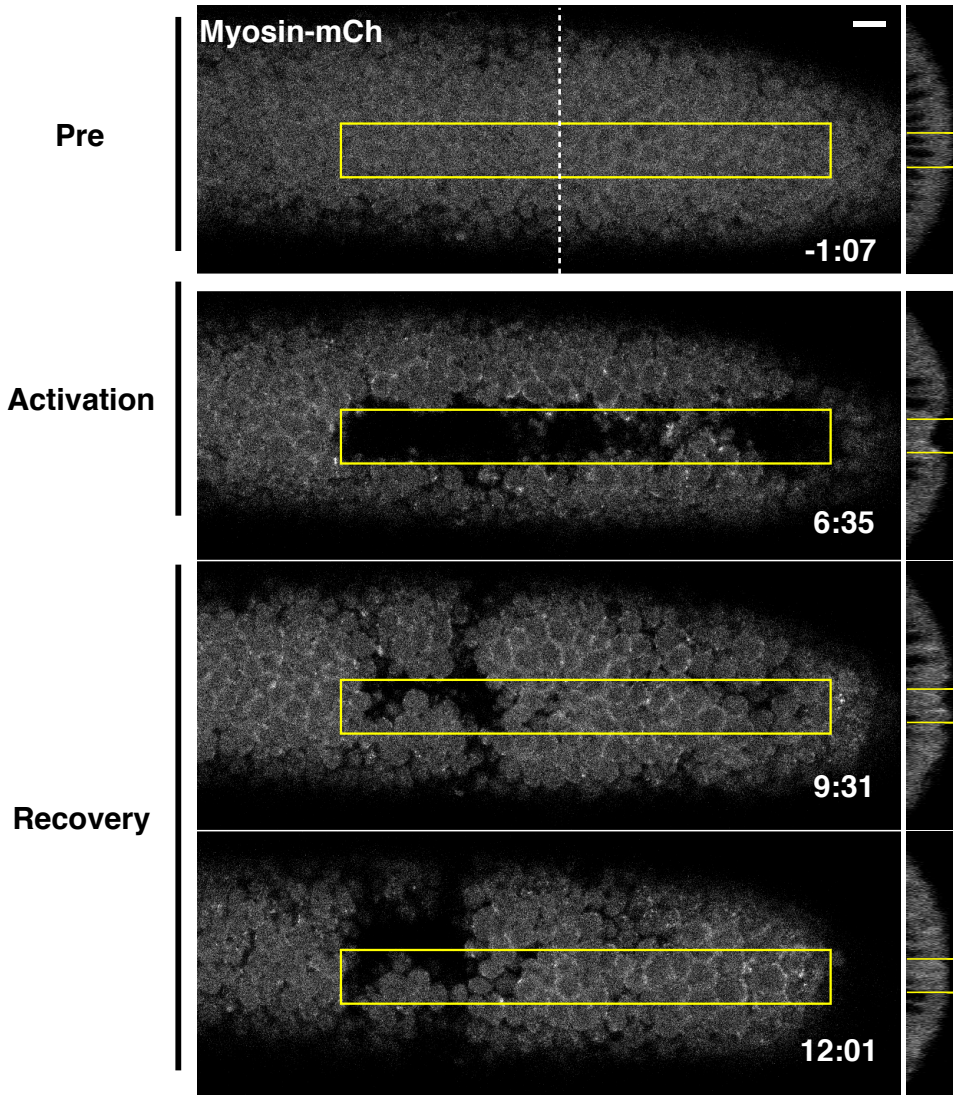

Supplement: supp [file elife-56893-supp-v1.zip › elife_poa_e56893_Figure_3_figure_supplement_2.pdf]
